# Supplementary material for: Early development and functional properties of tryptase/chymase double-positive mast cells from human pluripotent stem cells
Source: PubMed Central journal article supplement — J Mol Cell Biol. 2020 Oct 30;13(2):104–15. doi: 10.1093/jmcb/mjaa059 (PMC8104937; doi:10.1093/jmcb/mjaa059), 2020-10-30
Supplement: mjaa059_supplementary_data.pdf [file mjaa059_supplementary_data.pdf]

## **Supplementary Information**

Supplemental Information includes Supplemental Experimental Procedures, four figures, and four tables.

### **Supplemental Experimental Procedures**

#### **Cell lines**

Human H1 ESCs at passage 40-50 were cultured on Matrigel-coated plates in mTeSR1 medium (Stem Cell Technologies).

#### **Coculture of hESCs on AGM-S3 cells to induce hematopoietic differentiation**

Undifferentiated hESC clumps (approximately 30 colonies per well of a 6-well plate or 180 clumps in a 10 cm dish), each consisting of 500 to 2,000 cells per clump, were physically picked under a microscope and transferred onto irradiated AGM-S3 cells. Culture medium composed of IMDM containing 10% fetal bovine serum (FBS) (BI) was supplemented with 5.5  $\mu\text{g}/\text{mL}$  human transferrin (Sigma), 2 mM L-glutamine, 50  $\mu\text{g}/\text{ml}$  ascorbic acid, and 20 ng/ml vascular endothelial growth factor (VEGF) (Perptech). Culture medium was replaced every day. At day 14, the cocultures were treated with 0.25% trypsin/EDTA solution (GIBCO). Subsequently, whole cells (including multipotent hematopoietic progenitor cells) were collected for future use.

#### **Expansion of CD34<sup>+</sup>CD45<sup>+</sup> hematopoietic progenitor cells**

Similar to our previous studies (Mao B et al, 2016), total cocultured cells were harvested by treatment with 0.25% trypsin/EDTA solution and sorted CD34<sup>+</sup>CD45<sup>+</sup> cells, and then cultured in a non-adhesion 24-well plate (Costar, plate surfaces resistant to cell adhesion) in IMDM medium with 10% FBS and a cocktail of cytokines favoring hematopoietic progenitor cell development (SCF, 100ng/ml; IL-3, 10ng/ml; IL-6, 100ng/ml; Flt3; 5ng/ml; and TPO, 5ng/ml) for 7 days. This method ensured the robust growth of hematopoietic progenitor cells with no growth of stromal cells. After 7 days in culture, a large quantity of hematopoietic progenitor cells was obtained, most of which were of the myeloid phenotype.

#### **Induction of MCs in serum-free culture medium**

In the next stage, the hematopoietic progenitor cells were shifted to serum-free MC culture in IMDM and 10% SFEM II (Stem Cells Tech) with the addition of SCF (100ng/ml), Flt-3 (2ng/ml), IL-6 (50ng/ml), and TPO (2ng/ml). Half of the volume of culture medium was replaced with fresh medium twice per week.

#### **MCs Derived from Human Cord Blood CD34<sup>+</sup> HSPCs**

To generate mucosal-type MCs, we isolated hCB CD34<sup>+</sup> HSPCs using CD34<sup>+</sup> Dynabeads (Stem Cell Tech; purity >90%) and cultured them in serum-free medium with SCF (100ng/ml) and IL-6 (80ng/ml). Half the volume of culture medium was replaced with fresh medium twice per week.

#### **MCs derived from CD34<sup>+</sup>c-kit<sup>+</sup> cell populations**

Cocultured day8 cells were dissociated with 0.01% trypsin-EDTA solution (Invitrogen) and filtered through a 40 µm nylon mesh to obtain a single-cell suspension. CD34<sup>+</sup>c-kit<sup>+</sup> cell population was sorted using a MoFlo Astrios High Speed Cell Sorter (Beckman Coulter), and then cultured in a non-adhesion 24-well plate by SFEM II (stem cell) medium and a cocktail of cytokines favoring MC development (SCF,100ng/ml; IL-6, 100ng/ml; and Flt-3, 20ng/ml). Half of the volume of culture medium was replaced with fresh medium twice per week.

#### **Flow cytometry and cell sorting**

Cocultured cells were detached with 0.25% trypsin-EDTA solution (Invitrogen) and filtered through a 70 µm nylon mesh to generate a single-cell suspension. Flow cytometry was performed using a FACSCanto II system (BD Biosciences), and data were analyzed using FlowJo software (v10.0.8.). Cell sorting was performed using a MoFlo Astrios High Speed Cell Sorter (Beckman Coulter). The antibodies used are presented in Table S2.

#### **Low level RNA-seq data processing**

Total RNA was extracted from cells using TRIzol (Invitrogen) according to the manufacturer's instructions. A PureLink RNA Micro kit (Invitrogen) was used to extract total RNA from sorted cells. cDNA was synthesized using an iScript cDNA Synthesis kit (Bio-Rad). All real-time PCR assays were performed using FastStart Universal SYBR Green Master (Roche) and an iQ5 thermal cycler (Bio-Rad).

Expression of target genes was normalized against that of *GAPDH*. All reactions were performed in triplicate. The primers used are listed in Table S3.

#### **Morphological observations and immunofluorescence staining of MCs**

Mature MC culture cells were centrifuged and mounted onto glass slides. Cytospin preparations were then stained with MGG, acidic toluidine blue, and Alcian blue. For MC-specific tryptase and chymase assays, an immunofluorescence staining method was used, as previously reported (Ma F et al, 2008). The antibodies used are listed in Table S4.

#### **Confirmation of MCs**

MCs were confirmed to be 90% pure by immunofluorescence staining for c-kit and tryptase. Cells were used for further studies when the morphology was 100% uniform.

### **Activation of MCs**

For IgE stimulation, MCs at 12 weeks of MC culture were cultured for 3 days in medium supplemented with 4 µg/ml IgE. To assess activation, cells were washed, suspended in Thyrode's Solution, and pre-incubated for 5 min at 37°C. For stimulation, 10 µl CRA-1 or control mouse IgG, substance P (MCE), or compound 48/80 (Sigma) were added to a 90 µl cell suspension ( $4 \times 10^4$  cells/ml) in 96-well plates and incubated for a further 30 min at 37°C. The reaction was stopped by adding 100 µl ice-cold buffer. Cells were separated by centrifugation at 300 x g for 7 min at 4°C, and the supernatant was collected. The cell pellet was resuspended in 200 µl buffer containing 0.5% Triton-X and 0.1% bovine serum albumin (BSA), snap frozen in liquid nitrogen, and thawed four times. After centrifugation at 12,000 x g for 15 min at 4°C, soluble extract was collected. Histamine levels were measured using a histamine ELISA kit (Abcam).

### **Intracellular histamine assay**

Intracellular histamine concentration was measured by quantifying histamine levels in cell lysates using the same ELISA histamine assay kit. Briefly, 500 MCs at 12 weeks of MC culture were washed and pooled in 0.5 ml PBS. The cell suspensions were then snap frozen in liquid nitrogen and quickly returned to a 37°C water bath to thaw. The freeze-thaw cycle was repeated twice, and cell lysate histamine content was then measured according to the manufacturer's protocol.

### **Cytokine production by stimulated MCs**

MCs (100,000/mL) at 12 weeks were stimulated with IgE followed by anti-IgE-R for 24 h before the supernatant was collected into a micro-centrifuge tube and frozen at -80°C for cytokine quantification.

### **Multiplex cytokine analysis**

Cytokine concentrations in the culture supernatants were measured using Meso Scale human assays for the indicated cytokines per the manufacturer's instructions (Meso Scale Discovery, Gaithersburg, MD). Seventeen cytokines were assessed using a human cytokine kit (U-PLEX Biomarker Group 1 Assay containing IL-1β, IL-2, IL-4, IL-5, IL-6, IL-7, IL-8, IL-10, IL-12/IL23p40, IL-13, IL-17α, TNF-α, IFN-γ, G-CSF, GM-CSF, MCP-1, and MIP-1β) on a SECTOR Imager instrument (Meso Scale Discovery, Rockville, MD, USA) according to the manufacturers' protocols.

### **Cell preparation**

Fresh cells were harvested and resuspended at  $1 \times 10^5$  cells/ml in 1×PBS and 0.04% BSA. Cell concentration was determined using a Countess® II Automated Cell Counter, and the volume was adjusted to obtain the target cell concentration before proceeding with the 10x Genomics® Single Cell Protocol.

### **Batch corrections among samples**

Considering the batch effects among samples in day 5 and day 5\_5, FindIntegrationAnchors and IntegrateData contained in the Seurat package were used to align datasets across different batches and merge samples into one object with default parameters.

### **Identification of differentially expressed genes (DEGs)**

The FindAllMarkers function of Seurat was used to identify DEGs among different clusters. The parameter “only.pos” was set as “TRUE”, which returned the upregulation gene clusters. A wilcoxon test was used to evaluate the statistical significance of each gene.

### **Inventory of supplemental information**

Table S1. Summary of the sequencing metrics for the two samples.

Table S2. Antibodies used for flow cytometric analysis.

Table S3. Primers used for qRT-PCR analysis.

Table S4. Antibodies used for immunostaining.

Figure S1, Related to Figure 1.

Figure S2, Related to Figure 2.

Figure S3, Related to Figure 3.

Figure S4, Related to Figure 4.

**Table S1: Summary of sequencing metrics for the two samples.**

| <b>Sample</b>                                  | <b>D5</b>   | <b>D5_5</b> |
|------------------------------------------------|-------------|-------------|
| Estimated Number of Cells                      | 2167        | 6734        |
| Mean Reads per Cell                            | 438699      | 138923      |
| Median Genes per Cell                          | 6206        | 4209        |
| Number of Reads                                | 950,662,793 | 935,511,175 |
| Valid Barcodes                                 | 0.97        | 0.97        |
| Q30 Bases in Barcode                           | 0.96        | 0.96        |
| Q30 Bases in RNA Read                          | 0.90        | 0.90        |
| Q30 Bases in UMI                               | 0.96        | 0.96        |
| Reads Mapped to Genome                         | 0.91        | 0.89        |
| Reads Mapped Confidently to Genome             | 0.89        | 0.86        |
| Reads Mapped Confidently to Intergenic Regions | 0.06        | 0.07        |
| Reads Mapped Confidently to Intronic Regions   | 0.13        | 0.15        |
| Reads Mapped Confidently to Exonic Regions     | 0.70        | 0.65        |
| Reads Mapped Confidently to Transcriptome      | 0.66        | 0.61        |
| Reads Mapped Antisense to Gene                 | 0.009       | 0.01        |
| Fraction Reads in Cells                        | 0.82        | 0.83        |
| Total Genes Detected                           | 17116       | 17288       |
| Median UMI Counts per Cell                     | 48199       | 23711       |

**Table S2: Antibodies used for Flow cytometry**

| <b>Name</b> | <b>Format</b>    | <b>Brand</b> | <b>Cat. No.</b> | <b>Isotype</b> | <b>Clone</b> |
|-------------|------------------|--------------|-----------------|----------------|--------------|
| c-kit       | PE               | eBioscience  | 12-1179-42      | Ms IgG1, κ     | YB5.B8       |
| c-kit       | APC              | eBioscience  | 17-1179-42      | Ms IgG1, κ     | YB5.B8       |
| CD34        | APC              | BD           | 555824          | Ms IgG1, κ     | 581          |
| CD34        | PE-Cy7           | BD           | 560710          | Ms IgG1, κ     | 581          |
| CD43        | PE               | BD           | 560199          | Ms IgG1, κ     | 1G10         |
| CD45        | PE               | BD           | 555483          | Ms IgG1, κ     | HI30         |
| CD45        | PE-Cy7           | BD           | 557748          | Ms IgG1, κ     | HI30         |
| CD309/Flk1  | PE               | BioLegend    | 359904          | Ms IgG1, κ     | 7D4-6        |
| CD13        | PE               | BD           | 561599          | Ms IgG1, κ     | WM15         |
| CD203c      | PE               | MACS         | 130-099-238     | Ms IgG1, κ     | FR3-16A11    |
| CD88        | PE               | BD           | SC-53796        | Ms IgG1, κ     | W17/1        |
| FcεRIα      | PE               | eBioscience  | 12-5899-42      | Ms IgG2b, κ    | AER-37       |
| CD81        | PE               | BD           | 551112          | Ms IgG1, κ     | JS-81        |
| HLA-DR      | APC              | BD           | 559866          | Ms IgG2a, κ    | G46-6        |
| CD31        | PE               | BioLegend    | 303106          | Ms IgG1, κ     | WM59         |
| CD144       | Alexa Fluor® 647 | BD           | 561567          | Ms IgG1, κ     | 55-7H1       |
| FVS520      |                  | BD           | 564407          | Ms IgG1, κ     |              |
| 7-AAD       |                  | BD           | 559925          | Ms IgG1, κ     |              |

**Table S3: Primers used for qRT-PCR**

| <b>Gene</b> | <b>Direction</b> | <b>Sequences</b>       |
|-------------|------------------|------------------------|
| c-kit       | Forward          | CACCGAAGGAGGCACTTACACA |
|             | Reverse          | TGCCATTCACGAGCCTGTCGTA |
| Tryptase    | Forward          | GTGACGCAAATACCACCTTGGC |
|             | Reverse          | CCATTCACCTTGCACACCAGGG |
| Chymase     | Forward          | TGTGGGCAATCCCAGGAAGACA |
|             | Reverse          | GACCGTCCATAGGATACGATGC |
| GAPDH       | Forward          | GTCTCCTCTGACTTCAACAGCG |
|             | Reverse          | ACCACCCTGTTGCTGTAGCCAA |

**Table S4: Antibodies used for Immunostaining**

| <b>Name</b>                  | <b>Manufacturer</b>     | <b>Species</b>   | <b>Cat. no.</b> |
|------------------------------|-------------------------|------------------|-----------------|
| c-kit(K963)                  | IBL                     | Rabbit to human  | 18101           |
| Tryptase(E-17)               | Santa Cruz              | Goat to human    | SC-17039        |
| Chymase(CC1)                 | Abcam                   | Mouse to human   | ab2377          |
| FITC-conjugated secondary Ab | Jackson Immuno Research | Donkey to Goat   | 705-095-003     |
| Cy3-conjugated secondary Ab  | Jackson Immuno Research | Donkey to Mouse  | 715-165-150     |
| Cy3-conjugated secondary Ab  | Jackson Immuno Research | Donkey to Rabbit | 711-165-152     |



**Figure S1**

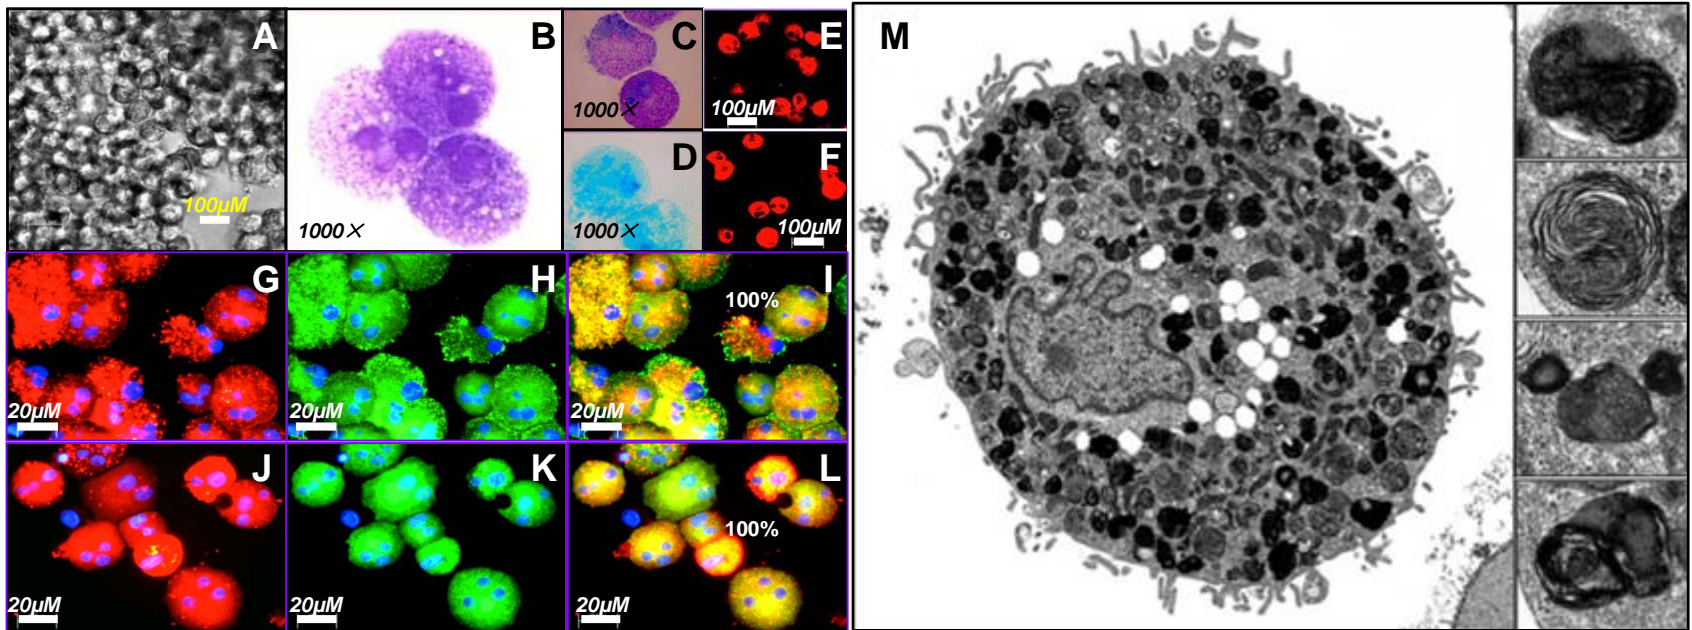

**Figure S1: Phenotype of MCs derived from hESC/AGM-S3 coculture system.** (A) hESC-MC growth under a microscope. Staining of hESC-MCs (20 weeks in SF-MC culture) with (B) May-Grunwald Giemsa, (C) Toluidine blue, (D) Alcian blue, (E) Carboxypeptase A, and (F) Cathepsin G. (G-L) hESC-MC maturity after 10 weeks in SF-MC culture was further confirmed by the 100% co-expression of (G) c-kit, (H) Tryptase, (I) Merged, (J) Chymase, (K) Tryptase, and (L) Merged. (M) Transmission electron microscope images of hESC-MCs after 20 weeks in SF-MC culture. The four small insets at the right side show various types of MC-specific granules.

**Figure S2**

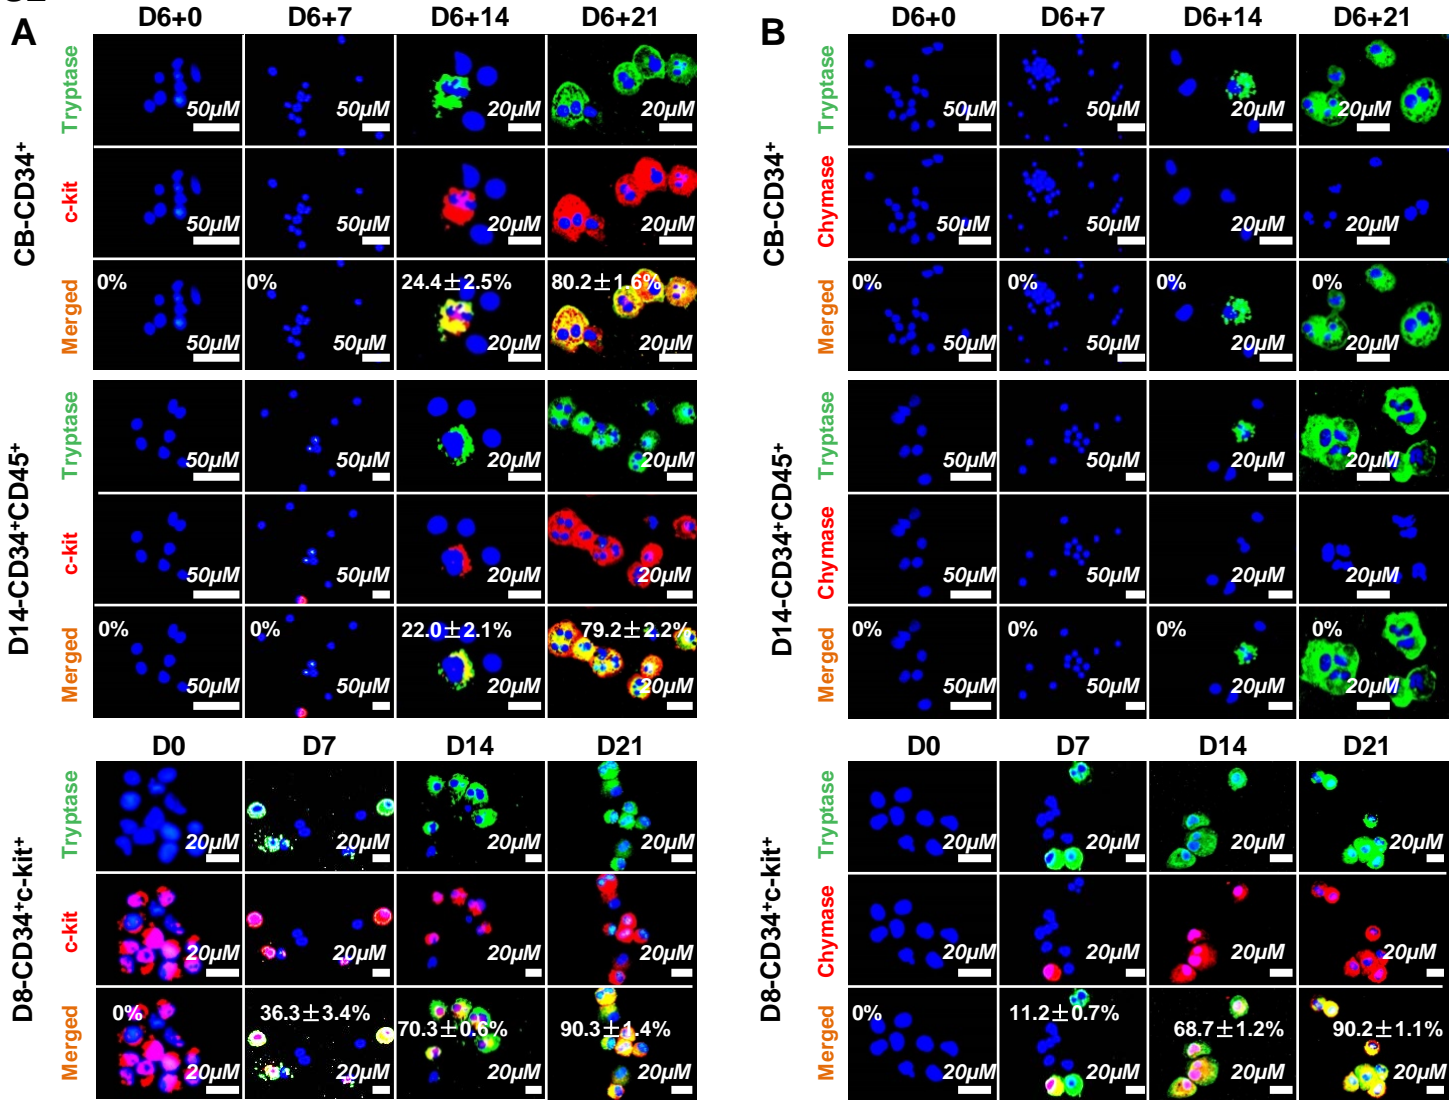

**Figure S2: Tryptase<sup>+</sup>/Chymase<sup>+</sup> MCs only appeared in daughter cells of coculture day8 CD34<sup>+</sup>c-kit<sup>+</sup> cell populations.** A high purity (~90%) of CD34<sup>+</sup>c-kit<sup>+</sup> population derived c-kit<sup>+</sup>tryptase<sup>+</sup>/chymase<sup>+</sup> MCs could be observed after 3 weeks in SF-MC culture. Photos represent immunostaining for (A) c-kit and tryptase double-positive MCs, and (B) tryptase and chymase double-positive MCs, over the time course of cultivation derived from the three different MCs.

**Figure S3**

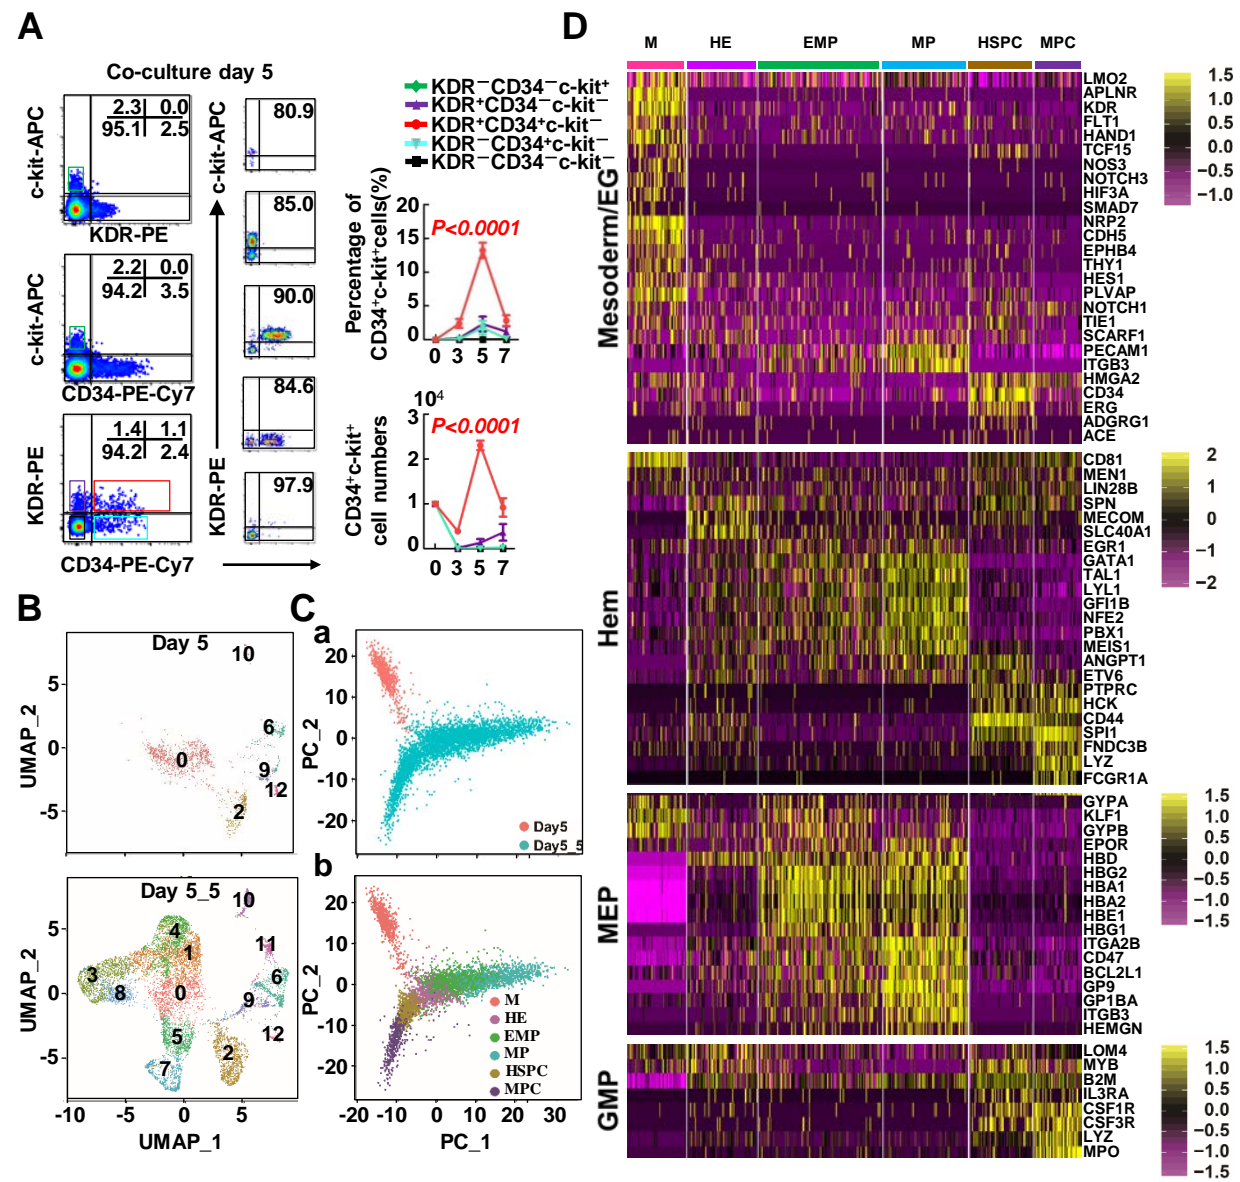

**Figure S3: CD34<sup>+</sup>c-kit<sup>+</sup> cell population primarily derived from the KDR<sup>+</sup>CD34<sup>+</sup> cell fraction and shared multi-directional development potential.** (A) Flow cytometric analysis of KDR<sup>-</sup>CD34<sup>-</sup>c-kit<sup>-</sup>, KDR<sup>+</sup>CD34<sup>-</sup>c-kit<sup>-</sup>, KDR<sup>-</sup>CD34<sup>+</sup>c-kit<sup>-</sup>, KDR<sup>+</sup>CD34<sup>+</sup>c-kit<sup>-</sup>, and KDR<sup>-</sup>CD34<sup>-</sup>c-kit<sup>+</sup> cells sorted from hESC/AGM-S3 co-cultures on day 5. Percentages and absolute numbers of CD34<sup>+</sup>c-kit<sup>+</sup> cells derived from each cell fraction are shown. Error bars represent mean ± SD of samples from at least three independent experiments. (B) Identification of cell populations in (a) D5 and (b) D5\_5 visualized by UMAP. Each dot represents one cell, and colors represent the cell clusters as indicated. (C) PCA plot of (a) D5 and D5\_5 samples and (b) PCA plot of Mesoderm, HE, EMP, MP, HSPC, and MPC clusters. (D) Heatmap showing scaled expression of mesoderm, EG, Hem, MEP, and GMP-related genes in the six clusters.

# Figure S4

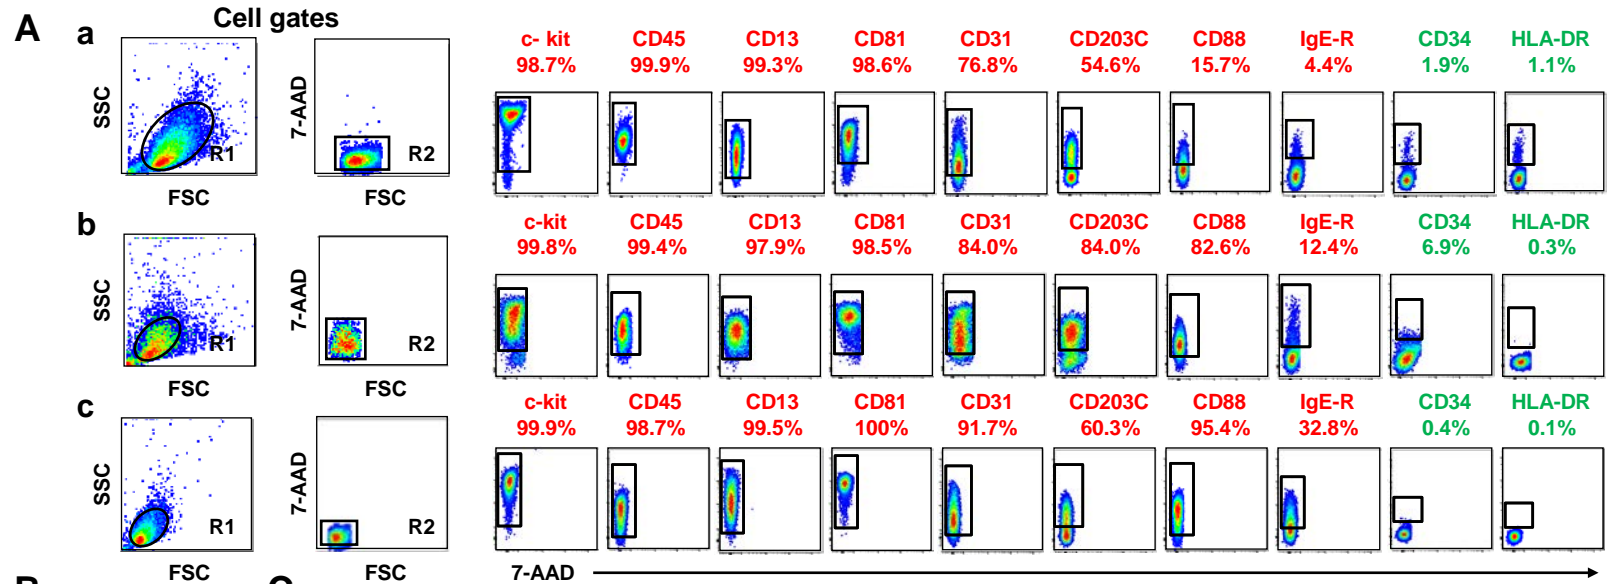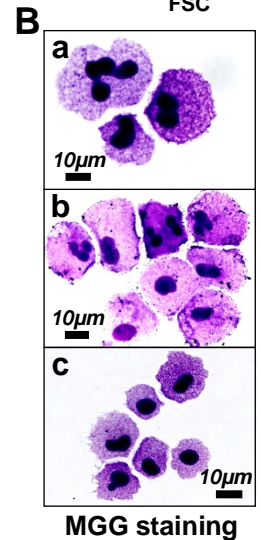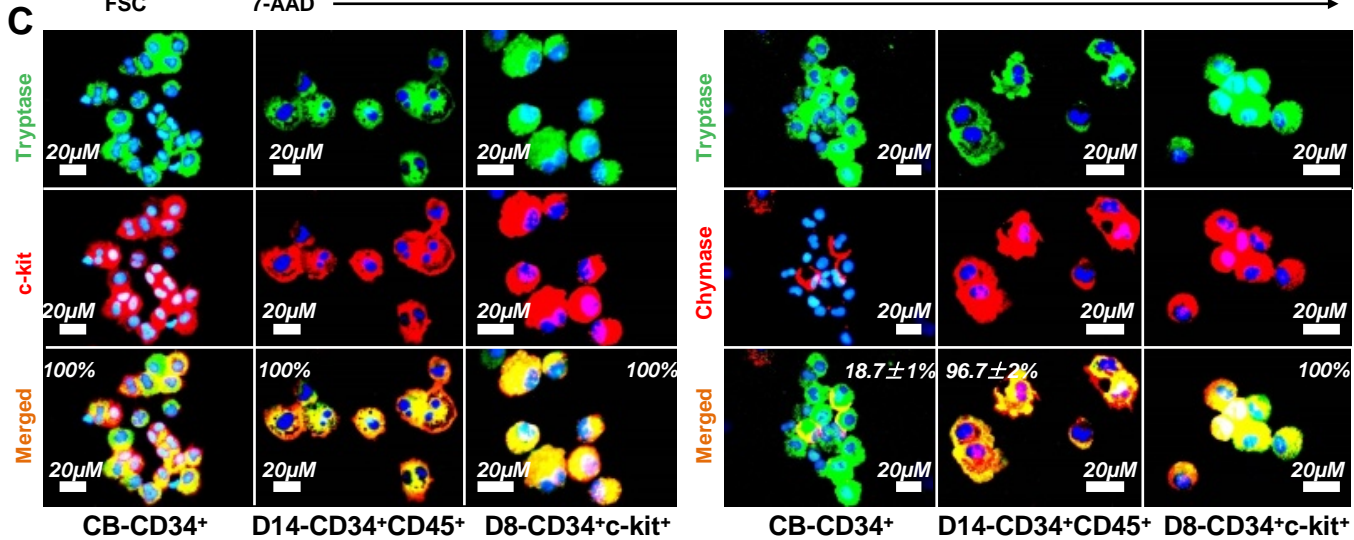

**Figure S4: Morphological characters and molecular profiling of surface marker expression among the three different MCs.** (A) Representative dot plots of surface marker expression of different protocol derived mature MCs, including (a) CB CD34<sup>+</sup>, (b) coculture day14 CD34<sup>+</sup>CD45<sup>+</sup>, (c) and coculture day8 CD34<sup>+</sup>c-kit<sup>+</sup> cells (12 weeks in SF-MC culture). (B) MGG analysis showing typical morphology of MCs from (a) CB-CD34<sup>+</sup>, (b) coculture day14 CD34<sup>+</sup>CD45<sup>+</sup>, and (c) coculture day8 CD34<sup>+</sup>c-kit<sup>+</sup>. Independent experiments, n = 3; mean ± SD. Scale bars, 10 µm. (C) Immunostaining analysis showing expression of human c-kit, Tryptase, and Chymase in MCs derived from different pathways. Independent experiments, n = 3; mean ± SD. Scale bars, 20 µm.
